# Supplementary material for: Flower-like Cu2NiSnS4microspheres for application as electrodes of asymmetric supercapacitors endowed with high energy density
Source: Royal Society of Chemistry journal article supplement (doi:10.1039/c7ce02101a), 2018-01-01
Supplement: c7ce02101a1.pdf [file c7ce02101a1.pdf]

**Electronic Supplementary Information**

**Flowerlike Cu<sub>2</sub>NiSnS<sub>4</sub> Microspheres for Application as Electrodes of  
Asymmetric Supercapacitors Endowed with High Energy Density**

Samrat Sarkar<sup>a</sup>, Promita Howli<sup>b</sup>, Uttam Kumar Ghorai<sup>c</sup>, Biswajit Das<sup>b</sup>, Madhupriya Samanta<sup>a</sup>

Nirmalya Sankar Das<sup>a†</sup>, and Kalyan Kumar Chattopadhyay<sup>a,b,\*</sup>

<sup>a</sup>School of Materials Science and Nanotechnology, Jadavpur University, Kolkata 700032, India

<sup>b</sup>Thinfilm and Nanoscience Laboratory, Department of Physics, Jadavpur University, Kolkata  
700032, India

<sup>c</sup>Department of Industrial Chemistry and Applied Chemistry, Swami Vivekananda Research  
Center, Ramakrishna Mission Vidyamandira, Belurmath, Howrah 711202, India

<sup>†</sup>Present Address - Department of Basic Science and Humanities, Techno India - Batanagar,  
Kolkata 700141, India

\*Corresponding Author's e-mail: [kalyan\\_chattopadhyay@yahoo.com](mailto:kalyan_chattopadhyay@yahoo.com)

Tel.: +91 9433389445; Fax: +91 33 2414 6007

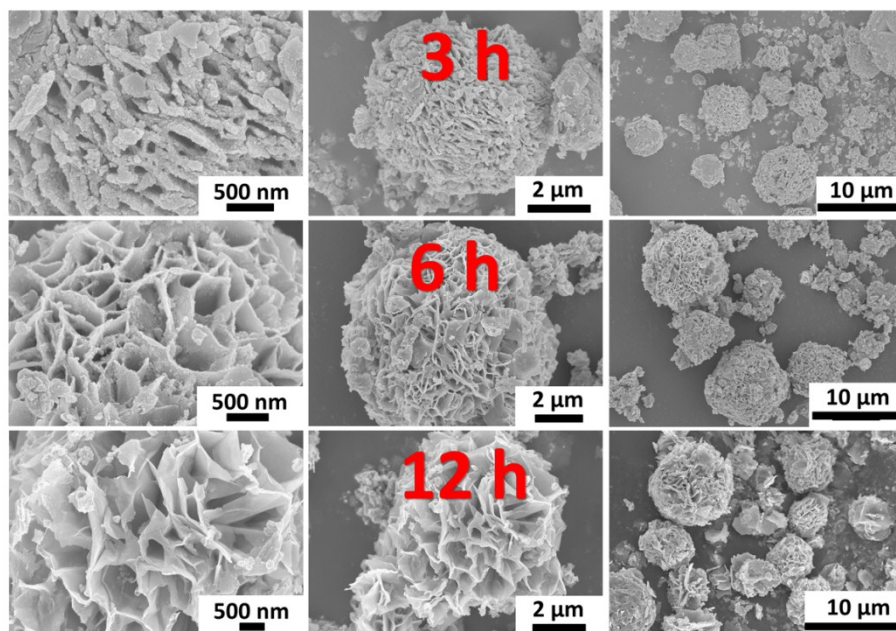

**Figure S1:** FESEM images at different magnifications of the samples (top, middle and bottom row are the samples obtained after 3 h, 6 h and 12 h of hydrothermal treatment).

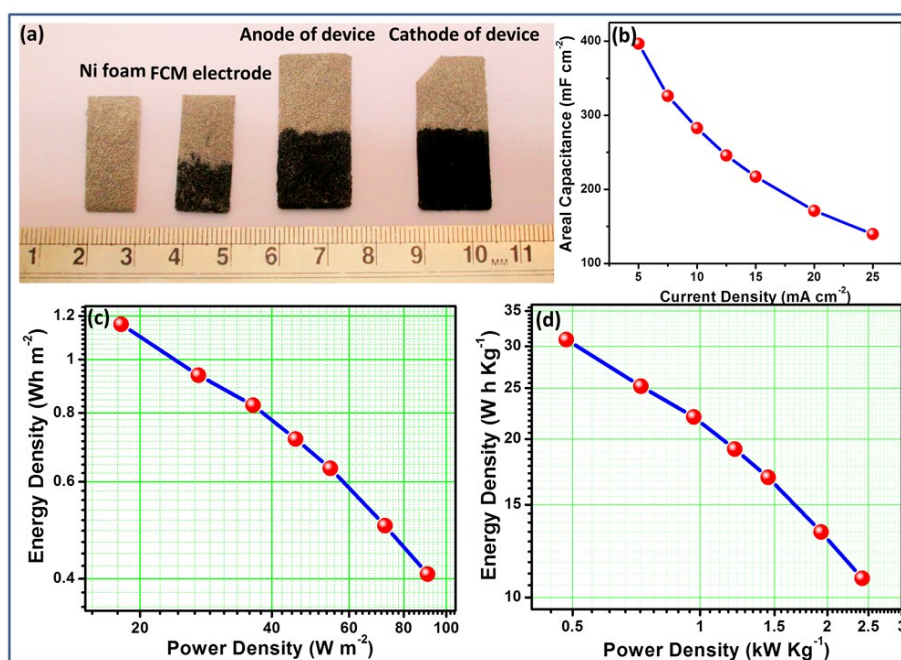

**Figure S2:** (a) Photograph of the prepared electrodes on Ni foam (b) Areal capacitance versus current density plot and (c) Areal and (d) Gravimetric ragone plots of the as fabricated asymmetric supercapacitor.

### Additional formulae and calculations

The specific capacitance ( $C_s$ ) of the electrodes is calculated from the following equations:

$$C_s = \frac{\int I(V)dV}{m \times \Delta V \times R} \quad \text{----- (1)}$$

$$C_s = \frac{I \times \Delta t}{m \times \Delta V} \quad \text{----- (2)}$$

Where  $I$  is the current,  $m$  is the active mass of the electrode material,  $\Delta V$  is the potential window,  $R$  is the scan rate and  $\Delta t$  is the discharge time.  $\int I(V)dV$  denotes the integral area within the closed CV curve. The above two equations calculate the specific capacitance from the CV and GCD curves respectively.

Volumetric capacitance is calculated employing the equation

$$C = \frac{I \times \Delta t}{v \times \Delta V} \quad \text{----- (3)}$$

The volumetric energy and power densities of the device are calculated using the equations

$$E = \frac{1}{2} C (\Delta V)^2 \quad \text{----- (4)}$$

$$P = \frac{E}{\Delta t} \quad \text{----- (5)}$$

Here  $C$  is the volumetric capacitance,  $\Delta V$  is the potential window,  $v$  is the effective volume of the ASC,  $\Delta t$  is the discharge time,  $I$  is the charging current,  $E$  is the volumetric energy density and  $P$  is the volumetric power density.

Before assembling the device, the masses of the composite and activated carbon used for the fabrication of the positive and negative electrodes are in accordance to the equation

$$\frac{m_+}{m_-} = \frac{C_- \Delta V_-}{C_+ \Delta V_+} \quad \text{----- (6)}$$

Where m is the active electrode mass, C is the specific capacitance of electrode and ΔV is the voltage window. The suffixes ‘+’ and ‘-’ represent the parameter values for the positive and negative electrodes respectively.

**Calculation of areal (C<sub>A</sub>), gravimetric (C<sub>S</sub>) and volumetric capacitances (C<sub>V</sub>) of ASC**

$$C_A = (I \times \Delta t) / (A \times \Delta V) \quad (\text{in mF cm}^{-2}) \quad (\text{when I is in mA})$$

Where A (in cm<sup>2</sup>) is the total effective area of both the electrodes of the ASC.

$$C_S = (I \times \Delta t) / (m \times \Delta V) \quad (\text{in F g}^{-1}) \quad (\text{when I is in mA and m is in mg})$$

Here m is the total mass of active materials in both electrodes of ASC.

$$C_V = (I \times \Delta t) / (v \times \Delta V) \quad (\text{in F cm}^{-3}) \quad (\text{when I is in A})$$

v (in cm<sup>3</sup>) is the effective volume of ASC.

**Calculation of areal (E<sub>A</sub>, P<sub>A</sub>), gravimetric (E<sub>S</sub>, P<sub>S</sub>) and volumetric (E<sub>V</sub>, P<sub>V</sub>) energy and power densities of ASC**

$$E_A = C_A \times (\Delta V)^2 / 2 \quad (\text{in mW s cm}^{-2})$$

$$E_A = C_A \times (\Delta V)^2 / 720 \quad (\text{in W h m}^{-2})$$

$$P_A = E_A \times 3600 / \Delta t \quad (\text{in W m}^{-2})$$

$$E_S = C_S \times (\Delta V)^2 / 2 \quad (\text{in W s g}^{-1})$$

$$E_S = C_S \times (\Delta V)^2 / 7.2 \quad (\text{in W h Kg}^{-1})$$

$$P_S = E_S \times 3.6 / \Delta t \quad (\text{in kW Kg}^{-1})$$

$$(E_V = C_V \times (\Delta V)^2 / 2 \quad (\text{in W s cm}^{-3})$$

$$E_V = C_V \times (\Delta V)^2 / 7.2 \quad (\text{in mW h cm}^{-3})$$

$$P_V = E_V \times 3600 / \Delta t \quad (\text{in mW cm}^{-3})$$

In all the calculations,  $\Delta V$  and  $\Delta t$  are in volt and second respectively.
